# Supplementary material
Source: PubMed Central journal article supplement (PMC8371072)
Supplement: NIHMS1663879-supplement-1.pdf [file NIHMS1663879-supplement-1.pdf]

## Supplemental Material: Environmental metal exposures and kidney function of Guatemalan sugarcane workers

*Supplement Table 1: Comparison of demographics and clinical data among the study populations at all three time points.*

| Variables                                                        | November,<br>n=208 | January,<br>n=83      | July,<br>n=49          | p-value |
|------------------------------------------------------------------|--------------------|-----------------------|------------------------|---------|
|                                                                  | <b>Mean (SD)</b>   |                       |                        |         |
| Baseline Age, years                                              | 29 (8)             | 29 (7)                | 30 (10)                | 0.91    |
| Baseline BMI, mg/kg <sup>2</sup>                                 | 23 (2)             | 23 (2) <sup>B</sup>   | 24 (3) <sup>C</sup>    | 0.71    |
| Baseline HbA1c, %                                                | 5.4 (0.3)          | 5.4 (0.3)             | 5.4 (0.4) <sup>C</sup> | 0.26    |
| Baseline systolic blood pressure, mmHg                           | 106 (10)           | 105 (10) <sup>B</sup> | 109 (11) <sup>C</sup>  | 0.10    |
| Baseline diastolic blood pressure, mmHg                          | 71 (9)             | 68 (8) <sup>B</sup>   | 73 (8) <sup>C</sup>    | 0.01    |
|                                                                  | <b>N (%)</b>       |                       |                        |         |
| Local home of residence (vs. highland)                           | 99 (48%)           | 44 (53%)              | 31 (63%)               | 0.13    |
| Baseline diabetic (≥ 6.5% HbA1c)                                 | 1 (1%)             | 0                     | 1 (1%) <sup>C</sup>    | -       |
| Baseline hypertensive                                            | 5 (2%)             | 0 <sup>B</sup>        | 0 <sup>C</sup>         | -       |
| Baseline self-reported current smoker (vs. former/never)         | 25 (12%)           | 9 (12%) <sup>B</sup>  | 7 (16%)                | 0.81    |
| Recently smoked (≥ 50 ng/mL cotinine concentration) <sup>A</sup> | 69 (34%)           | 25 (30%)              | N/A                    | 0.64    |

<sup>A</sup> Measured in only in November and January. <sup>B</sup> N=73. <sup>C</sup> N=45.

*Supplement Table 2: Overall relationships based on spearman's correlation coefficient between metals (µg/L), cotinine, and renal biomarkers, n=340.*

|          | Cadmium | Nickel | Cotinine <sup>A</sup> | eGFR   | NGAL <sup>A</sup> | Alb <sup>A</sup> |
|----------|---------|--------|-----------------------|--------|-------------------|------------------|
| Arsenic  | 0.76**  | 0.58** | 0.03                  | -0.08  | 0.55**            | 0.16**           |
| Cadmium  |         | 0.65** | -0.02                 | -0.12* | 0.54**            | 0.34**           |
| Nickel   |         |        | -0.01                 | 0.03   | 0.48**            | 0.20**           |
| Cotinine |         |        |                       | -0.06  | 0.01              | -0.10            |
| eGFR     |         |        |                       |        | -0.18**           | -0.02            |
| NGAL     |         |        |                       |        |                   | 0.11             |

eGFR: estimated glomerular filtration rate; NGAL: urine neutrophil gelatinase-associated lipocalin; Alb: urine albumin.

<sup>A</sup> N=283

\*\* p-value < 0.01 \* p-value < 0.05.
